# Supplementary material for: A practical method for assigning uncertainty and improving the accuracy of alpha-ejection corrections and eU concentrations in apatite (U-Th)/He chronology
Source: Copernicus journal article supplement (doi:10.5194/egusphere-2022-1005), 2022-10-18

**UPDATED TABLE 3**

| This Study: 237 apatite grains; CT resolution: 0.64 $\mu\text{m}$                                |                    |      |                    |     |
|--------------------------------------------------------------------------------------------------|--------------------|------|--------------------|-----|
|                                                                                                  | avg.               |      | abs. avg. %        |     |
|                                                                                                  | 3D/2D <sup>b</sup> | 1s   | diff. <sup>c</sup> | 1s  |
| <b>All data: 237 grains</b>                                                                      |                    |      |                    |     |
| Volume                                                                                           | 0.85               | 0.17 | 19                 | 13  |
| <sup>238</sup> F <sub>T</sub>                                                                    | 0.96               | 0.04 | 4                  | 4   |
| R <sub>FT</sub>                                                                                  | 0.92               | 0.07 | 8                  | 6   |
| Length/Box A                                                                                     | 1                  | 0.07 | 5                  | 6   |
| Width 1/Box B                                                                                    | 0.99               | 0.06 | 5                  | 4   |
| Width 2/Box C                                                                                    | 1.09               | 0.14 | 13                 | 10  |
| <b>Hexagonal apatite: 201 grains</b>                                                             |                    |      |                    |     |
| Volume                                                                                           | 0.87               | 0.17 | 18                 | 12  |
| <sup>238</sup> F <sub>T</sub>                                                                    | 0.97               | 0.03 | 4                  | 3   |
| R <sub>FT</sub>                                                                                  | 0.93               | 0.06 | 7                  | 5   |
| Length/Box A                                                                                     | 1.01               | 0.07 | 5                  | 6   |
| Width 1/Box B                                                                                    | 1                  | 0.06 | 4                  | 4   |
| Width 2/Box C                                                                                    | 1.11               | 0.12 | 13                 | 10  |
| <b>Ellipsoid apatite: 36 grains</b>                                                              |                    |      |                    |     |
| Volume                                                                                           | 0.75               | 0.17 | 26                 | 15  |
| <sup>238</sup> F <sub>T</sub>                                                                    | 0.92               | 0.05 | 8                  | 4   |
| R <sub>FT</sub>                                                                                  | 0.86               | 0.08 | 15                 | 8   |
| Length/Box A                                                                                     | 0.98               | 0.06 | 6                  | 3   |
| Width 1/Box B                                                                                    | 0.97               | 0.07 | 6                  | 5   |
| Width 2/Box C                                                                                    | 0.97               | 0.16 | 12                 | 11  |
| <b>Previous Studies</b>                                                                          |                    |      |                    |     |
|                                                                                                  | avg.               |      | abs. avg. %        |     |
|                                                                                                  | 3D/2D              | 1s   | diff.              | 1s  |
| <b>Cooperdock et al. (2019): 108 apatite grains; CT resolution: 4-5 <math>\mu\text{m}</math></b> |                    |      |                    |     |
| Volume                                                                                           | 0.82               | 0.22 | 23                 | 16  |
| <sup>238</sup> F <sub>T</sub>                                                                    | 1.01               | 0.02 | 2                  | 2   |
| R <sub>FT</sub>                                                                                  | 1.02               | 0.07 | 5                  | 5   |
| Length/Box A                                                                                     | 0.98               | 0.1  | 4                  | 6   |
| Width 1/Box B                                                                                    | 1.03               | 0.07 | 16                 | 8   |
| Width 2/Box C                                                                                    | N/A                | N/A  | N/A                | N/A |
| <b>Glotzbach et al. (2019): 24 apatite grains; CT resolution: 1.2 <math>\mu\text{m}</math></b>   |                    |      |                    |     |
| Volume                                                                                           | 1.04               | 0.2  | 15                 | 13  |
| <sup>238</sup> F <sub>T</sub>                                                                    | 0.99               | 0.02 | 2                  | 2   |
| R <sub>SV</sub> <sup>d</sup>                                                                     | 0.93               | 0.06 | 8                  | 5   |

**Reply-Fig. 1: a) 2D length vs. 3D Box A, b) 2D max. width vs. 3D Box B, and c) 2D min. width vs. 3D Box C.**

a)

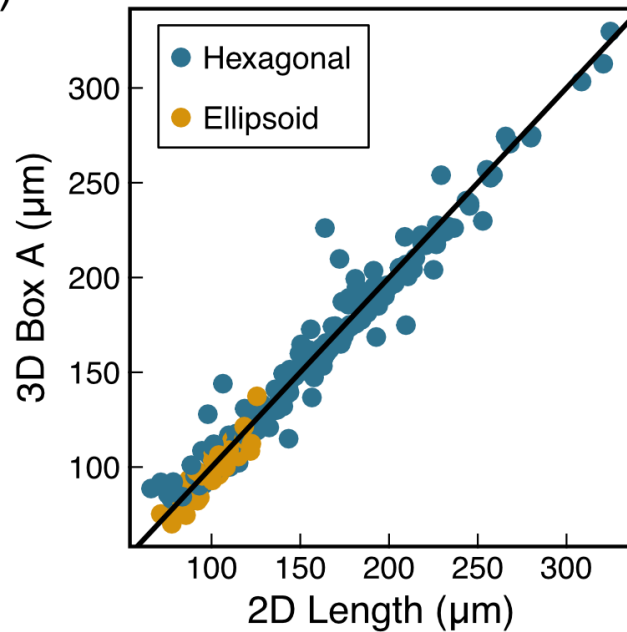

b)

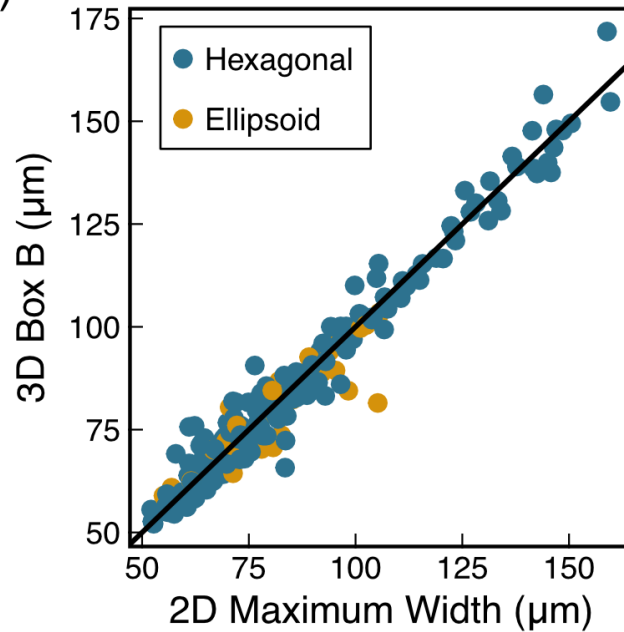

c)

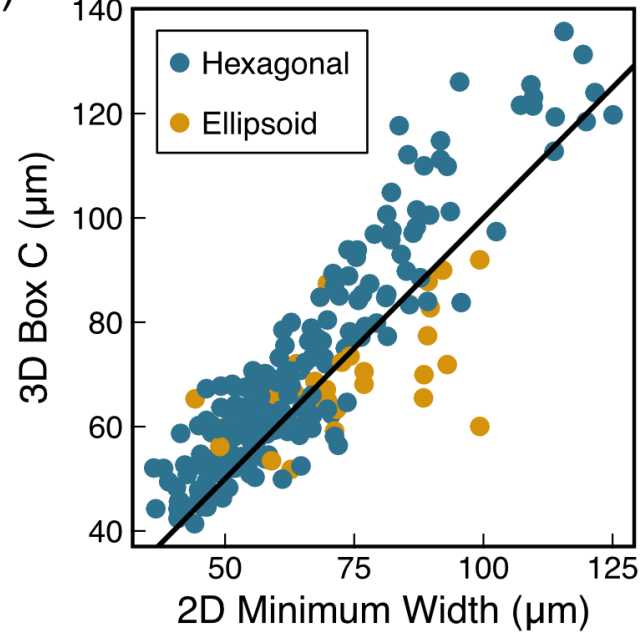

Corrections and uncertainties for 2D values calculated using the minimum and maximum width.

### Volume

| Geometry | Correction <sup>a</sup> | % Uncert. <sup>b</sup> (1s) for apatite grains of all sizes |  |
|----------|-------------------------|-------------------------------------------------------------|--|
| Volume   |                         |                                                             |  |
| Hex.     | 1.27                    | 21%                                                         |  |
| Ellip.   | 0.86                    | 28%                                                         |  |

### Isotope-specific $F_T$ values

| Geometry                      | Correction | % Uncert. (1s) for medium-sized <sup>c</sup> apatite grains | % Uncert. (1s) for large-sized <sup>d</sup> apatite grains |  |
|-------------------------------|------------|-------------------------------------------------------------|------------------------------------------------------------|--|
| <sup>238</sup> F <sub>T</sub> |            |                                                             |                                                            |  |
| Hex.                          | 1.08       | 6%                                                          | 3%                                                         |  |
| Ellip.                        | 0.96       | 6%                                                          | 6%                                                         |  |
| <sup>235</sup> F <sub>T</sub> |            |                                                             |                                                            |  |
| Hex.                          | 1.08       | 8%                                                          | 4%                                                         |  |
| Ellip.                        | 0.95       | 7%                                                          | 7%                                                         |  |
| <sup>232</sup> F <sub>T</sub> |            |                                                             |                                                            |  |
| Hex.                          | 1.08       | 8%                                                          | 4%                                                         |  |
| Ellip.                        | 0.95       | 7%                                                          | 7%                                                         |  |
| <sup>147</sup> F <sub>T</sub> |            |                                                             |                                                            |  |
| Hex.                          | 1.02       | 2%                                                          | 1%                                                         |  |
| Ellip.                        | 0.98       | 1%                                                          | 1%                                                         |  |

### R<sub>FT</sub>

| Geometry        | Correction | % Uncert. (1s) for apatite grains of all sizes |  |
|-----------------|------------|------------------------------------------------|--|
| R <sub>FT</sub> |            |                                                |  |
| Hex.            | 1.15       | 9%                                             |  |
| Ellip.          | 0.91       | 10%                                            |  |

**Reply-Fig. 2: 2D calculations using both the maximum and minimum widths.**

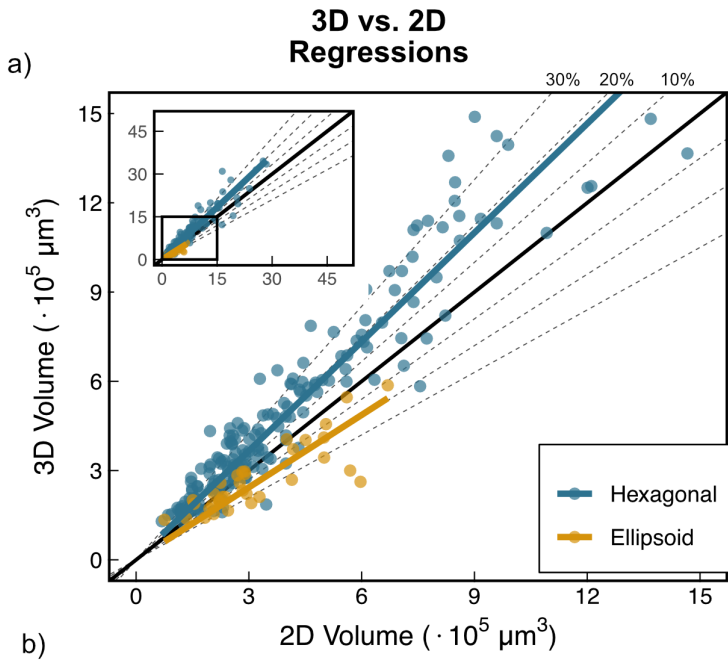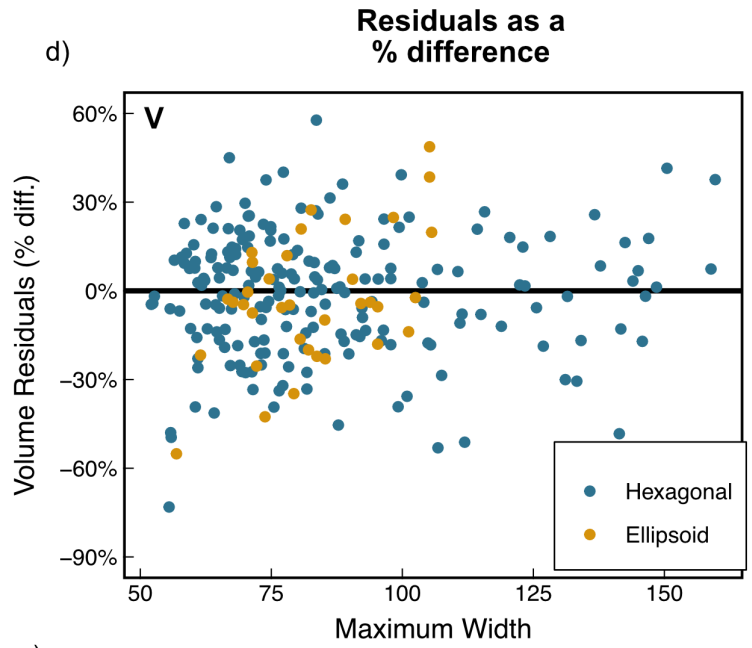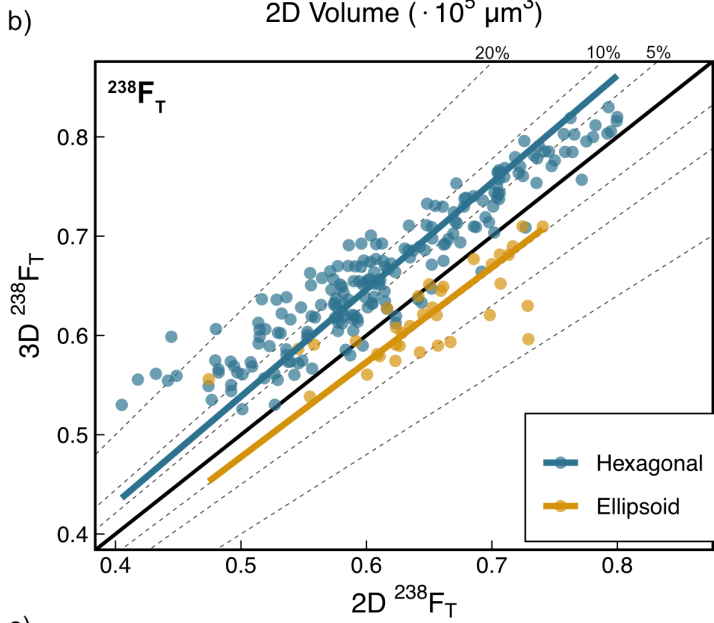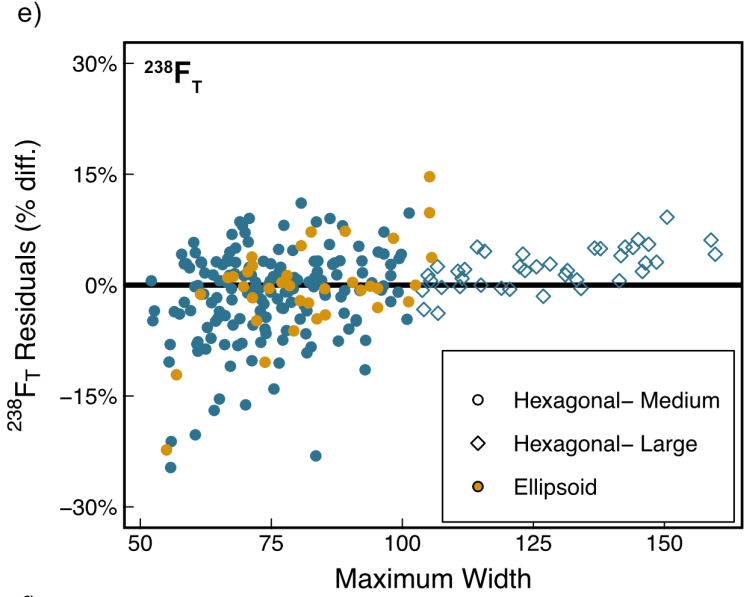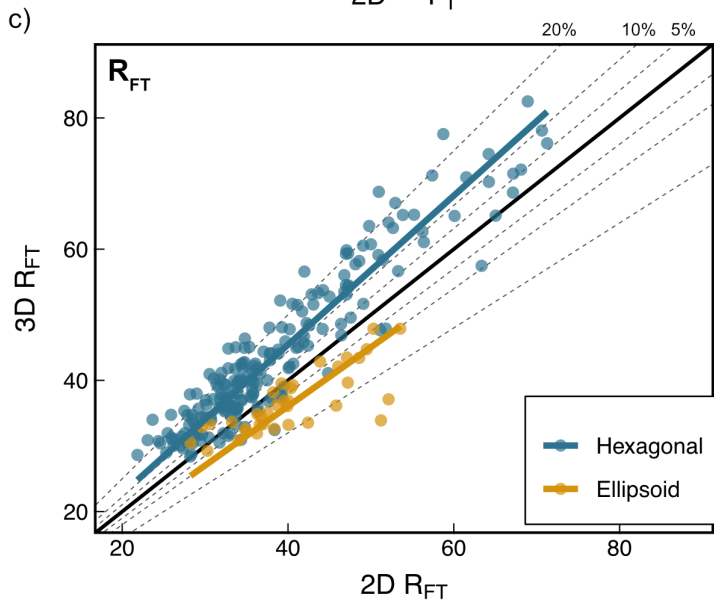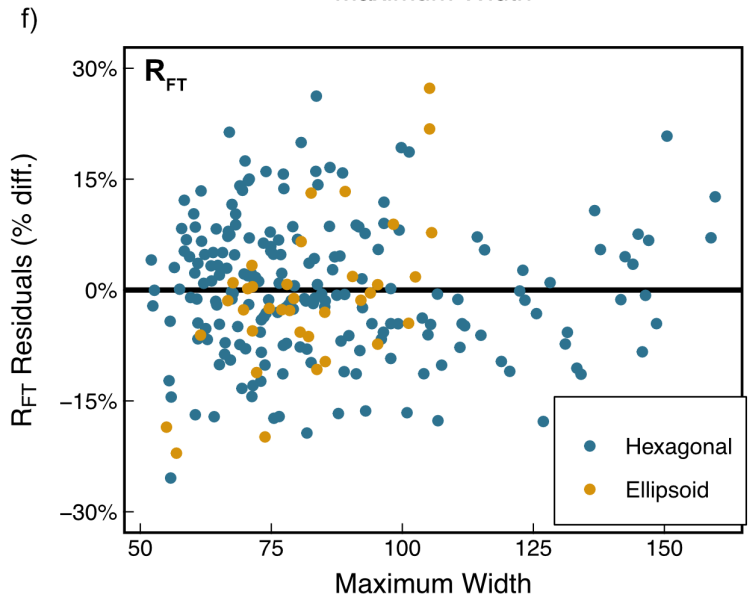

Supplement: Supplementary file [file egusphere-2022-1005-AC1-supplement.pdf]
